# Supplementary material for: Структура интегративного подхода к обучению иностранному языку
Source: MDPI journal article supplement (doi:10.3390/cancers14051354), 2011-01-01
Supplement: s1 [file s1]

# Supplementary Table.

**Table S1.** Clinical characteristics of patients who underwent conversion surgery.

| No. | Gender | Age  | Primary tumor site /NCCN resectability status | Radiological tumor size | Baseline CA19-9 | Peritoneal nodule | Regimen              | RECIST | minimum CA19-9 | An interval since initial treatment | Operation | T  | N | stage | R status | Evans | Recurrent site | DFS    | OS since CS | Status     |
|-----|--------|------|-----------------------------------------------|-------------------------|-----------------|-------------------|----------------------|--------|----------------|-------------------------------------|-----------|----|---|-------|----------|-------|----------------|--------|-------------|------------|
|     | M/F    | y.o. |                                               | mm                      | U/ml            | - / +             |                      |        | U/ml           | months                              |           |    |   |       |          |       |                | months | months      | Alive/Dead |
| 1   | M      | 64   | Ph: UR                                        | 91                      | 58              | -                 | GEM+S-1 +RT          | PR     | 14.1           | 8.2                                 | PD        | 1b | 0 | 1A    | R0       | III   | Peritoneum     | 6.6    | 10.0        | Dead       |
| 2   | F      | 73   | Ph: UR                                        | 27                      | 1597            | -                 | S-1+RT               | CR     | 21.9           | 6.3                                 | TP+PV+CHA | 1a | 0 | 1A    | R0       | III   | none           | 82.9   | 82.9        | Dead       |
| 3   | F      | 60   | Pbt: UR                                       | 35                      | 130             | -                 | S-1+PTX+i.p.-PTX     | PR     | 26             | 8.8                                 | DP-CAR+PV | 2  | 1 | 2B    | R1       | IIa   | Local          | 7.3    | 18.9        | Dead       |
| 4   | M      | 69   | Pbt: UR                                       | 43                      | 913             | +                 | S-1+PTX+i.p.-PTX     | PR     | 69.3           | 8.4                                 | DP        | 2  | 1 | 2B    | R0       | IIa   | Liver          | 5.1    | 17.7        | Dead       |
| 5   | M      | 81   | Pbt: R                                        | 34                      | 636             | +                 | S-1+PTX+i.p.-PTX     | PR     | 34.1           | 12.8                                | DP        | 1a | 0 | 1A    | R0       | III   | none           | /      | 86.8        | Alive      |
| 6   | M      | 75   | Pbt: UR                                       | 44                      | 598             | +                 | S-1+PTX+i.p.-PTX     | PR     | 62.5           | 10.5                                | DP        | 2  | 1 | 2B    | R0       | IIa   | Local          | 8.3    | 13.5        | Dead       |
| 7   | F      | 50   | Pbt: UR                                       | 25                      | 418             | +                 | S-1+PTX+i.p.-PTX     | PR     | 11.6           | 11.9                                | DP-CAR+PV | 2  | 1 | 2B    | R0       | IIb   | Peritoneum     | 8.6    | 25.0        | Dead       |
| 8   | F      | 74   | Ph: UR                                        | 41                      | 1778            | -                 | S-1+PTX+i.p.-PTX     | PR     | 13             | 13.0                                | TP+PV     | 1c | 0 | 1A    | R0       | IIb   | Peritoneum     | 12.6   | 14.0        | Dead       |
| 9   | F      | 73   | Pbt: R                                        | 74                      | 9.1             | +                 | GEM+S-1+i.p.-PTX     | PR     | 8.2            | 7.4                                 | DP        | 3  | 1 | 2B    | R0       | IIa   | Peritoneum     | 6.1    | 19.5        | Dead       |
| 10  | F      | 72   | Pbt: UR                                       | 46                      | 171.8           | -                 | GEM+nab-PTX+i.p.-PTX | PR     | 13.3           | 9.3                                 | PD+PV     | 1c | 0 | 1A    | R0       | IIb   | none           | 4.2    | 4.2         | Dead       |
| 11  | M      | 73   | Ph: BR                                        | 52                      | 266             | +                 | GEM+nab-PTX+i.p.-PTX | PR     | 26.6           | 9.7                                 | PD+PV     | 1b | 0 | 1A    | R0       | III   | none           | /      | 30.2        | Alive      |
| 12  | F      | 74   | Ph: UR                                        | 27                      | 2957            | -                 | GEM+nab-PTX+i.p.-PTX | PR     | 5              | 13.7                                | PD+PV     | 3  | 0 | 2A    | R0       | IIa   | Local          | 12.9   | 17.6        | Dead       |

M, male; F, female; Ph, pancreas head; Pbt, pancreas body and tail; R, resectable; BR, borderline resectable; UR, unresectable; GEM, gemcitabine; nab-PTX, nab-paclitaxel; RT, radiotherapy; i.p.-PTX, intraperitoneal paclitaxel; CR, complete response; PR, partial response; PD, pancreaticoduodenectomy; DP, distal pancreatectomy; DP-CAR, distal pancreatectomy with en-bloc celiac axis resection; TP, total pancreatectomy; CHA, common hepatic artery resection; PV, portal vein resection.
